# Supplementary material for: Defect Surface Engineering of Hollow NiCo2S4 Nanoprisms towards Performance-Enhanced Non-Enzymatic Glucose Oxidation
Source: MDPI journal article supplement (doi:10.3390/bios12100823), 2022-10-04
Supplement: s1 [file s1]

# Defect Surface Engineering of Hollow $\text{NiCo}_2\text{S}_4$ Nanoprisms towards Performance-Enhanced Non-Enzymatic Glucose Oxidation

Xiaomin Lang <sup>1,†</sup>, Dandan Chu <sup>1,†</sup>, Yan Wang <sup>1</sup>, Danhua Ge <sup>1,\*</sup> and Xiaojun Chen <sup>1,2,\*</sup>

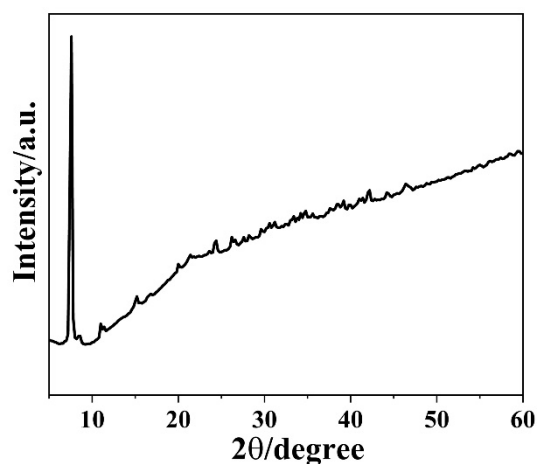

Figure S1. XRD pattern of Co/Ni precursors.

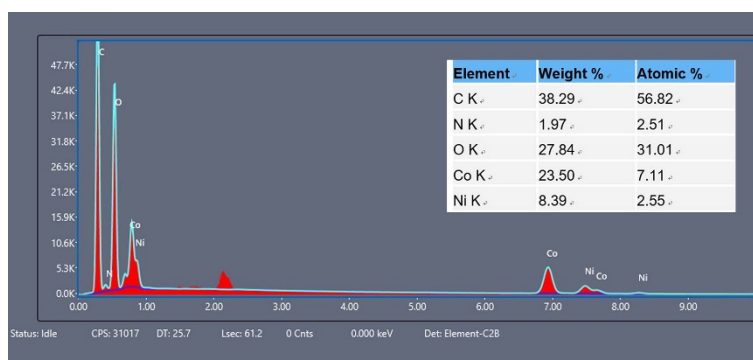

Figure S2. EDS spectrum of Co/Ni precursors.

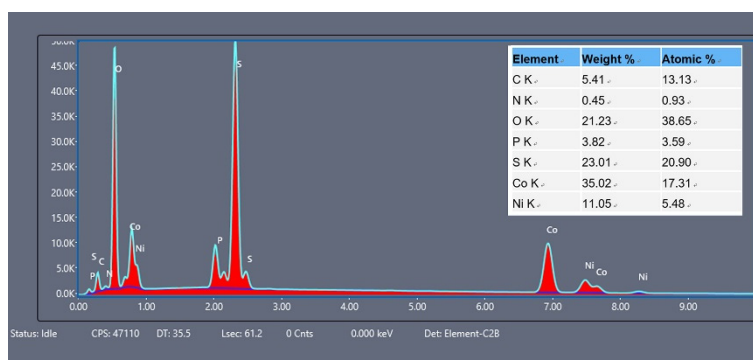

Figure S3. EDS spectrum of the P- $\text{NiCo}_2\text{S}_4$  HNPs.

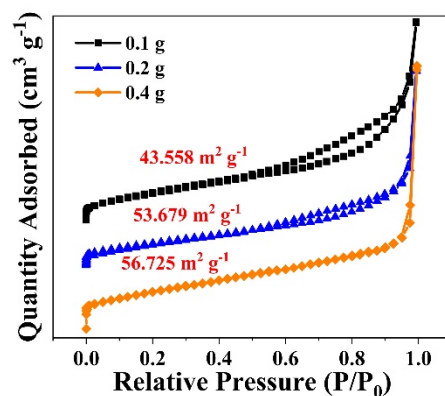

**Figure S4.** N<sub>2</sub> adsorption/desorption isotherms of P-NiCo<sub>2</sub>S<sub>4</sub>/ITO with different amounts of NaH<sub>2</sub>PO<sub>4</sub>.

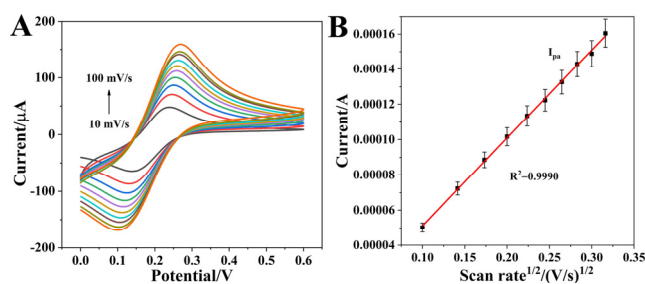

**Figure S5.** (A) CVs of P-NiCo<sub>2</sub>S<sub>4</sub>/ITO in 5 mM K<sub>3</sub>Fe(CN)<sub>6</sub> solution containing 0.1 M KCl at different scan rates. (B) The linear plot of  $I_p$  vs.  $v^{1/2}$  of P-NiCo<sub>2</sub>S<sub>4</sub>/ITO.

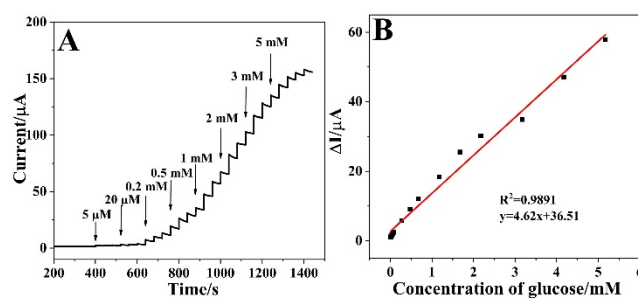

**Figure S6.** (A) Amperometric response of P-NiCo<sub>2</sub>S<sub>4</sub>/ITO with successive addition of glucose at 0.4 V in 0.2 M NaOH in healthy human serum samples. (B) The corresponding calibration curve of the glucose sensor.
